# Supplementary material
Source: PubMed Central journal article supplement (PMC3070098)
Supplement: mt2010297x1.pdf [file mt2010297x1.pdf]

**Supplementary Table s1.** Quantitation of pro-inflammatory cytokines and chemokines produced by BPH-1 cells in the presence or absence of reovirus

| (pg/ml)    | BPH-1 +<br>PBS | BPH-1 +<br>reovirus | LOD   | MAX     |
|------------|----------------|---------------------|-------|---------|
| Activin A  | 0.0            | 0.0                 | 399   | 200,000 |
| AgRP       | 0.0            | 0.0                 | 19    | 10,000  |
| Angiogenin | 200.7          | 92.1                | 12    | 40,000  |
| ANG-2      | 11,223.2       | 19,418.8            | 45    | 16,000  |
| ANGPTL4    | 0.0            | 756.0               | 1,424 | 400,000 |
| βFGF       | 0.0            | 231.2               | 103   | 20,000  |
| ENA-78     | 5.2            | 153.1               | 25    | 20,000  |
| GRO        | 1,428.5        | 1,839.2             | 5     | 8,000   |
| HB-EGF     | 60.1           | 113.3               | 17    | 8,000   |
| HGF        | 0.0            | 0.0                 | 7     | 8,000   |
| IFN-γ      | 0.0            | 0.0                 | 5     | 4,000   |
| IGF-I      | 0.0            | 0.0                 | 754   | 100,000 |
| IL-1α      | 32.4           | <b>5,114.2</b>      | 7     | 4,000   |
| IL-2       | 0.0            | 0.0                 | 14    | 8,000   |
| IL-6       | 1,233.0        | <b>7,350.9</b>      | 6     | 4,000   |
| IL-8       | 1,012.4        | 1,258.5             | 1     | 2,000   |
| IL-17      | 0.0            | 19.7                | 11    | 8,000   |
| IP-10      | 0.0            | 1,524.2             | 7     | 4,000   |
| Leptin     | 0.0            | 0.0                 | 44    | 80,000  |
| LIF        | 0.0            | 81.5                | 44    | 60,000  |
| MCP-1      | 0.0            | 176.7               | 8     | 4,000   |
| PDGF-BB    | 14.8           | 83.7                | 4     | 4,000   |
| PIGF       | 1.2            | 0.9                 | 2     | 8,000   |
| RANTES     | 13.3           | 2,145.5             | 12    | 40,000  |
| TGFb1      | 0.0            | 0.0                 | 716   | 200,000 |
| TIMP-1     | 24,243.1       | 34,584.8            | 1     | 80,000  |
| TIMP-2     | 25,304.2       | 19,853.7            | 18    | 40,000  |
| TNF-α      | 0.0            | 14.5                | 7     | 4,000   |

|               |                  |                  |       |           |
|---------------|------------------|------------------|-------|-----------|
| TNF- $\beta$  | 1.2              | 4.8              | 8     | 20,000    |
| TPO           | 0.0              | 0.0              | 522   | 400,000   |
| ANG-1         | 0.0              | 0.0              | 76    | 100,000   |
| Angiostatin   | 0.0              | 0.0              | 6,945 | 4,000,000 |
| CXCL16        | 1,708.8          | 1,491.8          | 9     | 4,000     |
| EGF           | 0.4              | 0.2              | 1     | 200       |
| FGF-4         | 0.0              | 0.0              | 657   | 200,000   |
| Follistatin   | <b>245,860.4</b> | <b>276,813.0</b> | 312   | 200,000   |
| G-CSF         | 0.0              | 3.7              | 18    | 40,000    |
| GM-CSF        | 13.3             | 285.5            | 8     | 4,000     |
| I-309         | 0.0              | 0.0              | 6     | 8,000     |
| IL-1 $\beta$  | 0.0              | 33.6             | 3     | 2,000     |
| IL-4          | 0.0              | 0.0              | 6     | 2,000     |
| IL-10         | 0.0              | 0.0              | 5     | 2,000     |
| IL-12p40      | 0.0              | 0.0              | 27    | 20,000    |
| IL-12p70      | 0.0              | 0.0              | 2     | 1,000     |
| I-TAC         | 0.0              | 38.5             | 6     | 4,000     |
| MCP-2         | 0.0              | 0.0              | 3     | 2,000     |
| MCP-3         | 0.0              | 0.0              | 8     | 8,000     |
| MCP-4         | 0.0              | 0.0              | 18    | 20,000    |
| MMP-1         | 17,096.3         | 22,643.6         | 74    | 40,000    |
| MMP-9         | 0.0              | 0.0              | 27    | 40,000    |
| PECAM-1       | 0.0              | 0.0              | 60    | 40,000    |
| TGF- $\alpha$ | 0.0              | 70.6             | 6     | 20,000    |
| TGF $\beta$ 3 | 0.0              | 0.0              | 107   | 80,000    |
| Tie-1         | 0.0              | 0.0              | 977   | 1,000,000 |
| Tie-2         | 0.0              | 0.0              | 69    | 40,000    |
| uPAR          | 899.0            | 4,990.7          | 120   | 80,000    |
| VEGF          | 7,839.4          | 9,531.8          | 28    | 20,000    |
| VEGF R2       | 0.0              | 0.0              | 31    | 20,000    |
| VEGF R3       | 0.0              | 0.0              | 50    | 40,000    |

|        |            |            |    |        |
|--------|------------|------------|----|--------|
| VEGF-D | <i>0.0</i> | <i>0.0</i> | 34 | 80,000 |
|--------|------------|------------|----|--------|

LOD: lower limit of detection; Max: Maximum limit of detection. The cytokine concentrations which were beyond the maximum limit of detection are shown in bold letters
